# Supplementary material
Source: publisher figshare collection journal article supplement (https://tandf.figshare.com/ndownloader/files/12718547)
Supplement: Supplementary file 1 [file 12718547]

Appendix Table 1. The unit-cell volume of Ne as a function of pressure on the MgO-Y17 scale [18].

*V*(MgO) *P*MgO (GPa) *V*Ne (Å3) *V*(MgO) *P*MgO (GPa) *V*Ne (Å3)

Run with Au: 62.29(4) 42.3(2) 32.71(6)

62.42(17) 41.6(8) 32.80(3) 62.57(2) 40.9(1) 32.88(4)

61.75(7) 45.1(4) 32.00(3) 62.27(2) 42.4(1) 32.53(15)

60.92(7) 49.6(4) 31.32(2) 62.34(7) 42.0(3) 32.57(6)

60.52(5) 51.9(3) 30.89(7) 62.51(5) 41.1(3) 32.96(8)

60.33(6) 53.0(4) 30.73(6) 62.30(2) 42.2(1) 32.68(6)

59.98(6) 55.1(4) 30.48(6) 62.28(1) 42.3(1) 32.52(11)

58.74(7） 62.8(5) 29.55(3) 61.81(7) 44.7(4) 32.23(12)

59.38(7) 58.7(5) 29.99(2) 62.08(4) 43.3(2) 32.49(7)

59.11(9) 60.4(6) 29.87(6) 61.90(5) 44.3(2) 32.25(2)

58.91(5) 61.7(3) 29.58(4) 61.68(1) 45.4(1) 31.99(6)

57.77(9) 69.4(7) 28.66(4) 61.23(2) 47.9(1) 31.68(6)

58.31(7) 65.7(5) 29.19(2) 60.46(3) 52.2(2) 30.96(4)

58.48(7) 64.5(5) 29.18(18) 59.69(5) 56.8(3) 30.22(5)

54.52(7) 95.2(6) 26.33(7) 59.89(4) 55.6(3) 30.45(5)

54.34(6) 96.7(6) 26.18(2) 59.43(2) 58.4(1) 29.96(2)

54.25(2) 97.6(2) 26.14(3) 58.86(4) 62.0(2) 29.51(2)

54.01(3) 99.8(3) 26.04(9) 58.76(4) 62.7(3) 29.49(10)

53.30(7) 106.5(7) 25.54(2) 58.14(10) 66.8(7) 28.82(5)

52.90(7) 110.5(7) 25.32(7) 58.42(8) 64.9(5) 29.19(3)

52.86(2) 110.9(2) 25.32(12) 58.50(3) 64.4(2) 29.27(14)

52.68(6) 112.7(6) 25.15(14) 58.62(3) 63.6(2) 29.35(2)

52.57(5) 113.9(5) 25.09(7) 61.07(4) 48.7(2) 31.23(7)

52.41(3) 115.5(3) 25.02(7) 61.03(1) 49.0(1) 31.25(4)

52.36(3) 116.1(3) 24.96(7) 56.30(4) 80.3(3) 27.57(3)

52.37(1) 115.9(1) 24.97(7) 55.22(5) 89.1(4) 26.78(2)

52.07(3) 119.2(3) 24.81(11) 54.56(6) 94.8(6) 26.42(3)

51.96(1) 120.4(1) 24.71(9) 53.12(2) 108.3(2) 25.46(8)

53.13(3) 108.2(3) 25.47(18)

Run with Pt: 52.53(8) 114.3(8) 25.08(15)

63.93(6) 34.4(3) 34.52(12) 51.96(9) 120.3(10) 24.72(7)

63.32(1) 37.2(1) 33.80(12) 51.89(10) 121.1(11) 24.67(6)

62.59(2) 40.7(1) 32.91(6) 51.28(5) 127.9(5) 24.33(15)

**Supplementary Figure captions:**

Figure S1. Comparison of the MgO scales [18,42,45-47] up to 250 GPa.

Figure S2. Isothermal compression of NaCl-B2 from Dorfmanet al.[3], with pressures calculated from the MgO-Y17 scale [18]. The curve represents the Vinet fitting for NaCl-B2 with the ambient volume fixed [49]. (Inset) Pressure differences between fitting (*P*NaCl) and observation (*P*MgO_Y17).

Figure S3. The *R*1 line shift of ruby luminescence at high pressure in a He medium from Speziale et al. [46] (gray circle) and Jacobsen et al. [50] (black diamond). The pressure is calculated on the MgO-Y17 scale [18]. (Inset) Pressure differences between fitting (*P*ruby) and observation (*P*MgO_Y17).

Figure S4. Comparisons of the (a) MgO, (b) Pt and (c) Au scales [18,19,47,48,52,53] up to 250 GPa. The scales from Ye et al. [18] are selected as references.

Figure S5. The Debye-Grüneisen parameter, D (a), the Debye temperature, D (b) and the Debye thermal pressure, *P*th (c) over the unit-cell volume at high pressure for this Ne dataset. (d) The unit-cell volume as a function of pressure with 3rd-order BM (solid curve) and Vinet (dashed curve) EOS fittings at 0 K. *P*0K = *P*300K - *P*th(*V*, 300K).

Figure S6. The fitted pressure residue for the modified 3rd-order BM (A) and Vinet (B) EOSs at *P*r = 4.7 GPa. These datasets have been presented in Figure 3, and the *P*std values are identical with those in Figure 3.
